# Supplementary material
Source: PubMed Central journal article supplement (PMC6699089)
Supplement: PRO-28-1734-s001.pdf [file PRO-28-1734-s001.pdf]

# ProtDCal-Suite: A web server for the numerical codification and functional analysis of proteins

Sandra Romero-Molina<sup>1</sup>, Yasser B. Ruiz-Blanco<sup>1\*</sup>, James R. Green<sup>2</sup> and Elsa Sanchez-Garcia<sup>1\*</sup>

<sup>1</sup> Computational Biochemistry, Center of Medical Biotechnology, University of Duisburg-Essen, Essen, North Rhine-Westphalia, 45117, Germany

<sup>2</sup> Systems and Computer Engineering, Carleton University, Ottawa, Ontario, K1S 5B6, Canada

## Supplementary Information

### Table of Content:

**Table SM-1.** Compendium of structural and chemical-physical amino acid properties.

**Table SM-2.** Formulae and description of 3D-thermodynamics indices.

**Table SM-3.** Formulae and description of thermodynamics indices for protein sequences.

**Table SM-4.** Formulae and description of topographic indices.

**Table SM-5.** Summary of vicinity operators.

**Table SM-6.** Summary of the definitions of residue-based groups.

**Table SM-7.** Summary of the definitions of property-based groups.

**Table SM-8.** Summary of the definitions of topographic-based groups.

**Table SM-9.** Aggregation operators: Distance invariants.

**Table SM-10.** Aggregation operators: Mean (first statistical moment) invariants.

**Table SM-11.** Aggregation operators: Statistical (highest statistical moments) invariants.

**Table SM-12.** Aggregation operators: Information-Theory-based invariants.

**Table SM-1.** Compendium of structural and chemical-physical amino acid properties.\*

|            | <b>Mw</b> | <b>HP</b> | <b>IP</b> | <b>ECI</b> | <b>L1-9</b> | <b>Z1</b> | <b>Z2</b> | <b>Z3</b> | <b>ISA</b> | <b>Xi</b> | <b>Pa</b> | <b>Pb</b> | <b>Pt</b> | <b>ΔHf</b> | <b>Ap</b> |
|------------|-----------|-----------|-----------|------------|-------------|-----------|-----------|-----------|------------|-----------|-----------|-----------|-----------|------------|-----------|
| <b>ALA</b> | 71        | 1.8       | 6.01      | 0.05       | 19.2        | 0.07      | -1.73     | 0.09      | 62.9       | -77.85    | 1.29      | 0.9       | 0.78      | -433.66    | 202.42    |
| <b>ARG</b> | 156       | -4.5      | 10.76     | 1.69       | 17.8        | 2.88      | 2.52      | -3.44     | 52.98      | 108.86    | 0.96      | 0.99      | 0.88      | -403.21    | 557.81    |
| <b>ASN</b> | 114       | -3.5      | 5.41      | 1.31       | 21.72       | 3.22      | 1.45      | 0.84      | 17.87      | -55.42    | 0.9       | 0.76      | 1.28      | -466.91    | 377.84    |
| <b>ASP</b> | 115       | -3.5      | 2.77      | 1.25       | 17.14       | 3.64      | 1.13      | 2.36      | 18.46      | 47.89     | 1.04      | 0.72      | 1.41      | -518.1     | 360.26    |
| <b>CYS</b> | 103       | 2.5       | 5.07      | 0.15       | 18.83       | 0.71      | -0.97     | 4.13      | 78.51      | 160.13    | 1.11      | 0.74      | 0.8       | -425.69    | 236.80    |
| <b>GLN</b> | 128       | -3.5      | 3.22      | 1.31       | 18.55       | 3.08      | 0.39      | -0.07     | 19.53      | 134.68    | 1.44      | 0.75      | 1         | -479.54    | 439.85    |
| <b>GLU</b> | 129       | -3.5      | 5.65      | 1.36       | 17.31       | 2.18      | 0.53      | -1.14     | 30.19      | 53.27     | 1.27      | 0.8       | 0.97      | -531.69    | 417.46    |
| <b>GLY</b> | 57        | -0.4      | 5.97      | 0.02       | 19.48       | 2.23      | -5.36     | 0.3       | 19.93      | -148.03   | 0.56      | 0.92      | 1.64      | -420.86    | 172.08    |
| <b>HIS</b> | 137       | -3.2      | 7.59      | 0.56       | 13.97       | 2.41      | 1.74      | 1.11      | 87.38      | -4.57     | 1.22      | 1.08      | 0.69      | -378.92    | 417.33    |
| <b>ILE</b> | 113       | 4.5       | 6.02      | 0.09       | 20.76       | -4.44     | -1.68     | -1.03     | 149.77     | -104.8    | 0.97      | 1.45      | 0.51      | -449.27    | 309.12    |
| <b>LEU</b> | 113       | 3.8       | 5.98      | 0.01       | 17.65       | -4.19     | -1.03     | -0.98     | 154.35     | -148.5    | 1.3       | 1.02      | 0.59      | -448.27    | 318.85    |
| <b>LYS</b> | 128       | -3.9      | 9.74      | 0.53       | 17.05       | 2.84      | 1.41      | -3.14     | 102.78     | 47.61     | 1.23      | 0.77      | 0.96      | -446.97    | 409.91    |
| <b>MET</b> | 131       | 1.9       | 5.74      | 0.34       | 17.88       | -2.49     | -0.27     | -0.41     | 132.22     | 46.37     | 1.47      | 0.97      | 0.39      | -435.34    | 332.93    |
| <b>PHE</b> | 147       | 2.8       | 5.48      | 0.14       | 16.81       | -4.92     | 1.3       | 0.45      | 189.42     | 47.67     | 1.07      | 1.32      | 0.58      | -376.77    | 414.12    |
| <b>PRO</b> | 97        | -1.6      | 6.48      | 0.16       | 18.55       | -1.22     | 0.88      | 2.23      | 122.35     | 169.73    | 0.52      | 0.64      | 1.91      | -422.17    | 261.24    |
| <b>SER</b> | 87        | -0.8      | 5.68      | 0.56       | 18.91       | 1.96      | -1.63     | 0.57      | 19.75      | 30.24     | 0.82      | 0.95      | 1.33      | -479.75    | 265.01    |
| <b>THR</b> | 101       | -0.7      | 5.87      | 0.65       | 17.15       | 0.92      | -2.09     | -1.4      | 59.44      | 46.04     | 0.82      | 1.21      | 1.03      | -483.37    | 292.47    |
| <b>TRP</b> | 186       | -0.9      | 5.89      | 1.08       | 20.94       | -4.75     | 3.65      | 0.85      | 179.16     | 178.69    | 0.99      | 1.14      | 0.75      | -365.49    | 530.87    |
| <b>TYR</b> | 163       | -1.3      | 5.66      | 0.72       | 16.86       | -1.39     | 2.32      | 0.01      | 132.16     | 49.11     | 0.72      | 1.25      | 1.05      | -446.32    | 472.98    |
| <b>VAL</b> | 99        | 4.2       | 5.97      | 0.07       | 17.88       | -2.69     | -2.53     | -1.29     | 120.91     | -106.5    | 0.91      | 1.49      | 0.47      | -434.3     | 276.26    |

**Mw** Molar Weight <sup>2</sup>

**HP** Kyte-Doolittle's Hydrophobicity Scale <sup>4</sup>

**IP** Isoelectric Point <sup>2</sup>

**ECI** Electronic Charge Index<sup>3</sup>

**L1-9** Compatibility parameter <sup>5</sup>

**Z1** Composed parameter related with hydrophilicity <sup>7</sup>

**Z2** Composed parameter related with steric features <sup>7</sup>

**Z3** Composed parameter related with electronic features <sup>7</sup>

**ISA** Isotropic Surface Area <sup>3</sup>

**Xi** Compatibility parameter <sup>5</sup>

**Pa** Levitt's Probability of adopting alpha helix conformation <sup>6</sup>

**Pb** Levitt's Probability of adopting beta sheet conformation <sup>6</sup>

**Pt** Levitt's Probability of adopting beta turn conformation <sup>6</sup>

**ΔHf(X)** enthalpy of formation of the peptide: AAAAXAAAA. <sup>5</sup>

**Ap** Molecular area of non-carbon atoms in the sidechain

\*This table was taken from the Supplementary Information of the ProtDCal manuscript.<sup>1</sup>

**Table SM-2.** Formulae and description of 3D-thermodynamics indices.\*

| Acronym           | Formula                                                                                                                | Description                                                                                                                                                                                                                                                                                                                                                                                                                                                                                        |
|-------------------|------------------------------------------------------------------------------------------------------------------------|----------------------------------------------------------------------------------------------------------------------------------------------------------------------------------------------------------------------------------------------------------------------------------------------------------------------------------------------------------------------------------------------------------------------------------------------------------------------------------------------------|
| G <sub>C(F)</sub> | $G_c(F)_i = RT(N-1)p_i \ln p_i,$ $p_i = \left( \frac{3}{2\pi(i-1)3.8^2} \right)^{3/2} e^{-\frac{3r_i^2}{2(i-1)3.8^2}}$ | Configurational free energy of a folded state. Index based on a “random-flight” model of the protein chain. <sup>8</sup> Where $r_i$ represents the distance to the first residue in the chain.                                                                                                                                                                                                                                                                                                    |
| W <sub>(F)</sub>  | $W_i^F = \sum_{j=1}^N \delta_{ij}^{ng} \delta_j^s N_j^w$                                                               | Number of water molecules close to a residue in a folded state. <sup>9; 10</sup> Where $\delta^{ng}$ takes value 1 if the pair of residues are neighbours, using a cutoff for the spatial distance (9.4 Å), or 0 otherwise. In the same way $\delta^s$ takes value 1 if the residue is superficial, using a cutoff for the solvent accessible surface area, or 0 otherwise. The parameters $N^w$ represents the number of associated water molecules to the sidechain of a residue <sup>11</sup> . |
| G <sub>w(F)</sub> | $G_w(F)_i = -TR\delta_{hyd} \ln \frac{W_i^F!}{(W_i^F - N_i^w)!}$                                                       | Free energy contribution of the entropy of the first shell of water molecules in a folded state <sup>10</sup> . $\delta_{hyd}$ takes value 1 if the residue has non-zero $N_i^w$ , or zero otherwise.                                                                                                                                                                                                                                                                                              |
| G <sub>S(F)</sub> | $G_s(F)_i = H_i A_i^F$                                                                                                 | Interfacial free energy contribution of a folded state. Where $H_i$ is hydrophobicity in Kyte-Doolittle scale <sup>4</sup> and $A^F$ is the solvent accessible surface area of a residue in a folded state.                                                                                                                                                                                                                                                                                        |
| $\Delta G_s$      | $\Delta G_{s_i} = G_s(F)_i - G_s(U)_i$                                                                                 | Interfacial free energy variation.                                                                                                                                                                                                                                                                                                                                                                                                                                                                 |
| HBd               | $\Delta Hbd_i = 0.5 \sum_{j=1}^N (\delta_{ij}^N + \delta_{ij}^O)$ <p>Geometric definition of a H-bond:</p>             | Number of backbone’s hydrogen bonds. Where $\delta_{ij}^N$ takes value 1 if the Nitrogen atom of residue $i$ is H-bonded with the Oxygen atom of residue $j$ and 0 otherwise. In the same way $\delta_{ij}^O$ takes value one if the Oxygen atom of residue                                                                                                                                                                                                                                        |

|                  |                                                                                                                                                                          |                                                                                                                                                                                               |
|------------------|--------------------------------------------------------------------------------------------------------------------------------------------------------------------------|-----------------------------------------------------------------------------------------------------------------------------------------------------------------------------------------------|
|                  | <p style="text-align: right;"> <math>d &lt; 2.5 \text{ \AA}</math><br/> <math>a = 120^\circ \text{ -- } 180^\circ</math> </p>                                            | <i>i</i> is H-bonded with the Nitrogen atom of residue <i>j</i> and zero otherwise.                                                                                                           |
| $\Delta G_{el}$  | $\Delta G_{el i} = -\frac{k_{el}}{2r^2} \sum_{j=1}^N \frac{q_i q_j r_i r_j}{r_{ij}}$                                                                                     | Free energy contribution of the charge distribution within the protein. The parameters <i>q</i> are the Electronic Charge Indices of each residue <sup>3</sup> . Parameter $k_{el} = 7.608$ . |
| $\Delta G_w$     | $\Delta G_{w i} = k_w (G_w(F)_i - G_w(U)_i)$                                                                                                                             | Folding free energy contribution of the entropy of the first shell of water molecules.                                                                                                        |
| $\Delta G_{LJ}$  | $\Delta G_{LJ i} = \frac{k_{LJ}}{2} \sum_{\substack{j=1; \\  j-i >1}}^N \left[ \left( \frac{3.965}{r_{ij}} \right)^{12} - \left( \frac{3.965}{r_{ij}} \right)^6 \right]$ | Residue-level Lennard-Jones interactions. Parameter $k_{LJ} = 63.981$ .                                                                                                                       |
| $\Delta G_{tor}$ | $\Delta G_{tor i} = k_{tor} [(\cos^2 2\phi_i - 1) + 0.256(\cos^2 2\psi_i - 1)]$                                                                                          | Free energy contribution of backbone torsion angles. Parameter $k_{tor} = 1.219$ .                                                                                                            |

\*This table was taken from the Supplementary Information of the ProtDCal manuscript.<sup>1</sup>

**Table SM-3.** Formulae and description of thermodynamics indices for protein sequences.\*

| Acronym | Formula                                                          | Description                                                                                                          |
|---------|------------------------------------------------------------------|----------------------------------------------------------------------------------------------------------------------|
| W(U)    | $W_i^U = \sum_{j=i-2}^{i+2} N_j^w$                               | Number of water molecules close to a residue in an unfolded state <sup>10</sup> .                                    |
| Gw(U)   | $G_w(U)_i = -TR\delta_{hyd} \ln \frac{W_i^U!}{(W_i^U - N_i^w)!}$ | Free energy contribution from the entropy of the first shell of water molecules in an unfolded state <sup>10</sup> . |
| Gs(U)   | $G_s(U)_i = H_i A_i^U$                                           | Interfacial free energy contribution of an unfolded state                                                            |

\*This table was taken from the Supplementary Information of the ProtDCal manuscript.<sup>1</sup>

**Table SM-4.** Formulae and description of topographic indices.\*

| Acronym         | Formula                                                                                                                                                                                                                                                                                                      | Description                                                                                                                                                                                                                                                                                                                                                                                                                                                                                                                                                                      |
|-----------------|--------------------------------------------------------------------------------------------------------------------------------------------------------------------------------------------------------------------------------------------------------------------------------------------------------------|----------------------------------------------------------------------------------------------------------------------------------------------------------------------------------------------------------------------------------------------------------------------------------------------------------------------------------------------------------------------------------------------------------------------------------------------------------------------------------------------------------------------------------------------------------------------------------|
| $A_F$           | -                                                                                                                                                                                                                                                                                                            | Solvent accessible surface area                                                                                                                                                                                                                                                                                                                                                                                                                                                                                                                                                  |
| $\Delta A$      | $\Delta A = A_F - A_U$                                                                                                                                                                                                                                                                                       | Buried area. Where $A_U$ is the fully exposed surface area of each residue and $A_F$ is the area in the folded state.                                                                                                                                                                                                                                                                                                                                                                                                                                                            |
| $\Delta A^{np}$ | $\Delta A^{np} = A^{np}_F - A^{np}_U$                                                                                                                                                                                                                                                                        | Buried non-polar area. Here nitrogen atoms and oxygen atoms are excluded.                                                                                                                                                                                                                                                                                                                                                                                                                                                                                                        |
| wSp             | $wSp_i = \omega_i * \delta_i^s$                                                                                                                                                                                                                                                                              | Weighted index of the solvent accessibility. Where $\omega$ represents any weighting property and the delta takes value 1 or 0 if the residue is considered superficial or internal respectively.                                                                                                                                                                                                                                                                                                                                                                                |
| lnFD            | $\ln FD_i = - \frac{\sum_{j: j-i >1}^N  j-i /d_{ij}^3}{N-x}$                                                                                                                                                                                                                                                 | Logarithm of the Folding Degree. Where $d$ is the spatial distance, $N$ the length of the protein and $x$ a parameter which takes value 2 for terminal residues and 3 for the others.                                                                                                                                                                                                                                                                                                                                                                                            |
| wR <sup>2</sup> | $wRG_i^2 = \frac{\omega_i * d_i^2}{\sum_{i=1}^N \omega_i}$                                                                                                                                                                                                                                                   | Weighted Squared Radius. Where $\omega$ represents any weighting property and $d$ is the spatial distance.                                                                                                                                                                                                                                                                                                                                                                                                                                                                       |
| w $\Delta$ HBd  | <p><math>\Delta Hbd_i = \omega_i * (\delta_N^N + \delta_O^O)</math><br/>                     Geometric definition of a H-bond:</p> 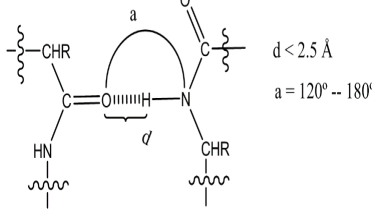 <p><math>d &lt; 2.5 \text{ \AA}</math><br/> <math>a = 120^\circ - 180^\circ</math></p> | Weighted deficit or excess of the H-bond between the backbone atoms. Where $\delta_{ij}^N$ takes value 1 if the nitrogen atom of residue $i$ is buried ( $A_{(N)} < 0.01 \text{ \AA}$ ) and is not H-bonded with any oxygen atom or 0 otherwise. In the same way $\delta_{ij}^O$ takes value 1 if the oxygen atom of residue $i$ is buried ( $A_{(O)} < 0.01 \text{ \AA}$ ) and is not H-bonded with any nitrogen atom and 0 otherwise.                                                                                                                                          |
| wNc             | $wNc_i = 0.5 \sum_{j \neq i}^N \omega_{ij} \delta_{ij}^c$                                                                                                                                                                                                                                                    | Weighted Number of Contact. Where $\delta_{ij}$ takes value 1 when the contact conditions are fulfilled and 0 otherwise. A contacts is defined for pair of residues with spatial distances shorter than a cutoff $d$ and topological distances longer than a cutoff $t$ . The parameter $\omega_{ij}$ represents a weighting coefficient for each pair of residues. This parameter is computed as the product, $\omega_i \omega_j$ , of the values, for each residue, of any property within a pool of 12 amino acid properties covering structural, physical-chemical features. |
| wFLC            | $wFLC_i = \frac{\sum_{ j-i  \leq 4}^N \omega_{ij} \delta_{ij}^c}{\sum_{i=1}^N \sum_{j=1}^N \omega_{ij} \delta_{ij}^c}$                                                                                                                                                                                       | Weighted Fraction of Local Contacts. The parameters $\delta_{ij}$ and $\omega_{ij}$ means the same as previous but here the topological cutoff value is fixed in $t = 1$ .                                                                                                                                                                                                                                                                                                                                                                                                       |
| wNLC            | $wNLC_i = 0.5 \sum_{ j-i  \leq 4}^N \omega_{ij} \delta_{ij}^c$                                                                                                                                                                                                                                               | Weighted Number of Local Contact The parameters $\delta_{ij}$ and $\omega_{ij}$ means the same as in $wNc$ but here the topological cutoff value is fixed in $t = 1$ .                                                                                                                                                                                                                                                                                                                                                                                                           |
| wCO             | $wCO_i = \frac{1}{2NN_c} \sum_{j \neq i}^N \omega_{ij} \delta_{ij}^c$                                                                                                                                                                                                                                        | Weighted Relative Contact Order <sup>12</sup> . Where $Nc$ represents the number of contacts in the protein.                                                                                                                                                                                                                                                                                                                                                                                                                                                                     |

|        |                                                                                                                                                                      |                                                                                                                                                                               |
|--------|----------------------------------------------------------------------------------------------------------------------------------------------------------------------|-------------------------------------------------------------------------------------------------------------------------------------------------------------------------------|
| wLCO   | $wLCO_i = \frac{\sum_{j \neq i}^N \omega_{ij} \delta_{ij}^c}{N \sum_{j \neq i}^N \delta_{ij}^c}$                                                                     | Weighted Local Contact Order. As difference with previous, the weighted contacts are divided by the same un-weighted local contact instead of all the contact in the protein. |
| wRWCO  | $wRWCO_i = \frac{\sum_{j \neq i}^N \omega_{ij} \delta_{ij}^c}{N}$                                                                                                    | Weighted Residue-Wise Contact Order <sup>13</sup> .                                                                                                                           |
| wCTP   | $wCTP_i = \frac{1}{2NN_c} \sum_{j \neq i}^N \omega_{ij}^2 \delta_{ij}^c$                                                                                             | Weighted Chain Topology Parameter <sup>14</sup> .                                                                                                                             |
| wCLQ   | $wCLQ_i = \frac{\sum_{j < l} \delta_{ij} \delta_{il} \delta_{lj} \omega_{ij} \omega_{il} \omega_{lj}}{\sum_{j < l} \delta_{ij} \delta_{il} \omega_{ij} \omega_{il}}$ | Weighted Cliquishness or Clustering Coefficient <sup>15</sup> .                                                                                                               |
| wPsi_H | $Psi\_H_i = \delta_i^{wH} * \omega_i$                                                                                                                                | Weighted Helix-like Psi angle. The delta takes value 1 if the angle is in the range [-77;-17] or 0 otherwise.                                                                 |
| wPsi_S | $Psi\_S_i = \delta_i^{wS} * \omega_i$                                                                                                                                | Weighted Sheet-like Psi angle. The delta takes value 1 if the angle is in the range [94;154] or 0 otherwise.                                                                  |
| wPsi_I | $Psi\_I_i = \delta_i^{wI} * \omega_i$                                                                                                                                | Weighted Irregular Psi angle. The delta takes value 1 if the angle is in one of the following ranges: [-180,-77), (-17;94), (154;180] or 0 otherwise.                         |
| wPhi_H | $Phi\_H_i = \delta_i^{wH} * \omega_i$                                                                                                                                | Weighted Helix like Phi angle. The delta takes value 1 if the angle is in the range [-87;-27] or 0 otherwise.                                                                 |
| wPhi_S | $Phi\_S_i = \delta_i^{wS} * \omega_i$                                                                                                                                | Weighted Sheet like Phi angle. The delta takes value 1 if the angle is in the range [-159;-99] or 0 otherwise.                                                                |
| wPhi_I | $Phi\_I_i = \delta_i^{wI} * \omega_i$                                                                                                                                | Weighted Irregular Phi angle. The delta takes value 1 if the angle is in one of the following ranges: [-180,-159), (-99;-87), (-27;180] or 0 otherwise.                       |
| Phi    | -                                                                                                                                                                    | Phi dihedral angle                                                                                                                                                            |
| Psi    | -                                                                                                                                                                    | Psi dihedral angle                                                                                                                                                            |
| TCD    | $wTCD_i = \frac{1}{2N^2} \sum_{j \neq i}^N \omega_{ij} \delta_{ij}^c$                                                                                                | Total Contact Distance <sup>16</sup> .                                                                                                                                        |

\*This table was taken from the Supplementary Information of the ProtDCal manuscript.<sup>1</sup>

**Table SM-5.** Weighting procedures (*Vicinity modifiers*) implemented in ProtDCal.\*

| Acronym  | Formula                                                                                                                      | Description                                                                                                                                                                                                                                                                                                                                                                                                                   |
|----------|------------------------------------------------------------------------------------------------------------------------------|-------------------------------------------------------------------------------------------------------------------------------------------------------------------------------------------------------------------------------------------------------------------------------------------------------------------------------------------------------------------------------------------------------------------------------|
| $AC_i^k$ | $AC_i^k = \sum_{j \geq 1}^N L_i L_j \delta(d_{ij}, k)$ <p>Condition: <math>(d_{ij} = k) ? \delta = 1 : \delta = 0</math></p> | Autocorrelation.<br>Where, $L_x$ are the index values of residues $i$ and $j$ and $k$ is a topological distance cutoff and $N$ is the total number of residues.                                                                                                                                                                                                                                                               |
| $GV_i^k$ | $GV_i^k = \frac{1}{N} \sum_{j=1; j \neq i}^N \frac{L_i L_j \delta(d_{ij}, k)}{d_{ij}}$                                       | Gravitational                                                                                                                                                                                                                                                                                                                                                                                                                 |
| $KH_i^m$ | $KH_i^m = \sum_{\alpha=1}^A \sqrt{\prod_{j=1}^{n_\alpha} L_{j\alpha}}$                                                       | Kier-Hall's connectivity-based operator.<br>Where, $A$ is the number of segments containing the residue $i$ , with a maximum length of $m$ residues, $n_\alpha$ is the number of residues in a sub-segment, $L_{j\alpha}$ is the index value of the residue $j$ in the segment $\alpha$ .                                                                                                                                     |
| $ES_i$   | $ES_i = L_i + \Delta L_i = L_i + \sum_{j=1; j \neq i}^N \frac{L_i - L_j}{(d_{ij} + 1)^2}$                                    | Electro-topological state (E-state index).<br>Where, $L_i$ is the intrinsic state (index) of the $i^{th}$ residue and $\Delta L_i$ is the field effect on the $i^{th}$ residue calculated as perturbation of the index value ( $L_i$ ) of $i^{th}$ residue by all other residues in the protein, $d_{ij}$ is the topological distance between the $i^{th}$ and the $j^{th}$ residue, and $N$ is the total number of residues. |
| $IB_i^2$ | $IB_i^2 = (N - 1) \sum_{j \neq i}^N a_{ij} (S_i S_j)^{-1/2}$ $S_i = L_i + \sum_{j \neq i}^N a_{ij} L_j$                      | Ivanciuc-Balaban.<br>Where, $a_{ij}$ represents the elements of the adjacency matrix, and $N$ is the number of residues. The exponent 2 is due to the use of the exponent $-1/2$ . Here the factor $(N-1)$ represents the number of virtual bonds among residues.                                                                                                                                                             |

\*This table was taken from the Supplementary Information of the ProtDCal manuscript.<sup>1</sup>



**Table SM-6.** Summary of the definitions of residue-based groups.\*

| <b>Acronym</b> | <b>Description</b>                                                  |
|----------------|---------------------------------------------------------------------|
| ALA            | Represents all alanine residues contained in the protein            |
| ARG            | Represents all arginine residues contained in the protein.          |
| ASN            | Represents the all asparagine residues contained in the protein.    |
| ASP            | Represents the all aspartic residues contained in the protein.      |
| CYS            | Represents the all cysteine residues in the protein.                |
| GLN            | Represents the all glutamine residues in the protein.               |
| GLU            | Represents the all glutamic residues in the protein.                |
| GLY            | Represents the all glycine residues contained in the protein.       |
| HIS            | Represents the all histidine residues contained in the protein.     |
| ILE            | Represents the all isoleucine residues in the protein.              |
| LEU            | Represents the all leucine residues contained in the protein.       |
| LYS            | Represents the all lysine residues contained in the protein.        |
| MET            | Represents the all methionine residues contained in the protein.    |
| PHE            | Represents the all phenylalanine residues contained in the protein. |
| PRO            | Represents the all proline residues contained in the protein.       |
| SER            | Represents the all Serine residues contained in the protein.        |
| THR            | Represents the all threonine residues contained in the protein.     |
| TRP            | Represents the all tryptophan residues contained in the protein.    |
| TYR            | Represents the all tyrosine residues contained in the protein.      |
| VAL            | Represents the all valine residues contained in the protein.        |

\*This table was taken from the Supplementary Information of the ProtDCal manuscript.<sup>1</sup>

**Table SM-7.** Summary of the definitions of property-based groups.\*

| <b>Acronym</b> | <b>Included Residues</b>                              | <b>Description</b>                                        |
|----------------|-------------------------------------------------------|-----------------------------------------------------------|
| <b>AHR</b>     | ALA, CYS, GLN, GLU, HIS, LEU, LYS, MET                | Common residues in alpha helix motifs.                    |
| <b>BSR</b>     | ILE, PHE, THR, TRP, TYR, VAL                          | Common residues in beta sheet motifs.                     |
| <b>RTR</b>     | ASN, ASP, GLY, PRO, SER                               | Common residues in reverse turn motifs.                   |
| <b>PCR</b>     | ARG, HIS, LYS                                         | Positive-electric-charged residues.                       |
| <b>NCR</b>     | ASP, GLU                                              | Negative-electric-charged residues.                       |
| <b>UCR</b>     | ASN, CYS, GLN, SER, THR, TYR                          | Uncharged residues.                                       |
| <b>ARM</b>     | HIS, PHE, TRP, TYR                                    | Aromatic residues.                                        |
| <b>ALR</b>     | ALA, GLY, ILE, LEU, MET, PRO, VAL                     | Aliphatic residues.                                       |
| <b>UFR</b>     | GLY, PRO                                              | Common residues promoting unfolding or distorted regions. |
| <b>NPR</b>     | ALA, GLY, ILE, LEU, MET, PHE, PRO, TRP, VAL           | Non-polar residues.                                       |
| <b>PLR</b>     | ARG, ASN, ASP, CYS, GLN, GLU, HIS, LYS, SER, THR, TYR | Polar residues.                                           |

\*This table was taken from the Supplementary Information of the ProtD-Cal manuscript.<sup>1</sup>

**Table SM-8.** Summary of the definitions of topographic-based groups.\*

| <b>Acronym</b> | <b>Description</b>                                            |
|----------------|---------------------------------------------------------------|
| HEX            | All residues in alpha helix conformation                      |
| SHT            | All residues in beta sheet conformation                       |
| TRN            | All residues in reverse turn conformation                     |
| RCL            | All residues in loops regions (Residues in TRN are excluded)  |
| INT            | Represents the all internal residues in the protein.          |
| SUP            | Represents all superficial residues contained in the protein. |
| PRT            | The whole protein                                             |

\*This table was taken from the Supplementary Information of the ProtDCal manuscript.<sup>1</sup>

**Table SM-9.** Aggregation operators: Distance invariants.\*

| <b>Acronym</b> | <b>Formula</b>                        | <b>Description</b>                                                                                                                            |
|----------------|---------------------------------------|-----------------------------------------------------------------------------------------------------------------------------------------------|
| N1             | $N1 = \sum_{i=1}^N  L_i $             | Minkowski's norms (p = 1) Manhattan norm. Where $L_i$ represents each index of the group of indices and N the number of indices in the group. |
| N2             | $N2 = \sqrt{\sum_{i=1}^N  L_i ^2}$    | Minkowski's norms (p = 2) Euclidean norm. Where $L_i$ represents each index of the group of indices and N the number of indices in the group. |
| N3             | $N3 = \sqrt[3]{\sum_{i=1}^N  L_i ^3}$ | Minkowski's norms (p = 3). Where $L_i$ represents each index of the group of indices and N the number of indices in the group.                |

\*This table was taken from the Supplementary Information of the ProtDCal manuscript.<sup>1</sup>

**Table SM-10.** Aggregation operators: Means (first statistical moment) invariants.\*

| Acronym | Formula                                                                                               | Description                                                       |
|---------|-------------------------------------------------------------------------------------------------------|-------------------------------------------------------------------|
| G       | $G = \sqrt[N]{\prod_{i=1}^N L_i}$                                                                     | Geometric Mean.<br>Where N is the number of indices in the group. |
| Ar      | $m_\alpha = \left( \frac{L_1^\alpha + L_2^\alpha + \dots + L_N^\alpha}{N} \right)^{\frac{1}{\alpha}}$ | Arithmetic Mean<br>(potential with $\alpha = 1$ )                 |
| P2      |                                                                                                       | Potential Mean<br>(potential with $\alpha = 2$ )                  |
| P3      |                                                                                                       | Potential Mean<br>(potential with $\alpha = 3$ )                  |
| M       |                                                                                                       | Harmonic Mean<br>(potential with $\alpha = -1$ )                  |

\*This table was taken from the Supplementary Information of the ProtDCal manuscript.<sup>1</sup>

**Table SM-11.** Aggregation operators: Statistical (highest statistical moments) invariants.\*

| Acronym | Formula                                                                                                              | Description                                                                                                                                    |
|---------|----------------------------------------------------------------------------------------------------------------------|------------------------------------------------------------------------------------------------------------------------------------------------|
| V       | $V = \frac{\sum_{i=1}^N (L_i - \bar{L})^2}{N - 1}$                                                                   | Variance.<br>Where N is the number of indices in the group.                                                                                    |
| S       | $S = \frac{N(X_3)}{(N - 1)(N - 2)(DE)^3}$<br>$X_3 = \sum_{a=1}^N (L_a - \bar{L})^3$                                  | Skewness.<br>Where N is the number of indices in the group and (DE) <sup>3</sup> is the standard deviation raised to the 3 <sup>rd</sup> power |
| K       | $k = \frac{N(N + 1)X_4 - 3(X_2)(X_2)(N - 1)}{(N - 1)(N - 2)(N - 3)(DE)^4}$<br>$X_j = \sum_{a=1}^N (L_a - \bar{L})^j$ | Kurtosis.<br>Where (DE) <sup>4</sup> is the standard deviation raised to the fourth power                                                      |
| DE      | $DE = \sqrt{\frac{\sum L_i - \bar{L}}{N - 1}}$                                                                       | Standard Deviation                                                                                                                             |
| CV      | $c_v = \frac{s}{\bar{L}}$                                                                                            | Variation Coefficient                                                                                                                          |
| RA      | $RA = L_{\max} - L_{\min}$                                                                                           | Range                                                                                                                                          |
| Q1      | $P25 = \left[ \frac{N}{4} + \frac{1}{2} \right]$                                                                     | Percentile 25.<br>Where N is the number of indices in the group.                                                                               |
| Q2      | $P50 = \left[ \frac{N}{2} + \frac{1}{2} \right]$                                                                     | Percentile 50.<br>Where N is the number of indices in the group.                                                                               |
| Q3      | $P75 = \left[ \frac{3N}{4} + \frac{1}{2} \right]$                                                                    | Percentile 75.<br>Where N is the number of indices in the group.                                                                               |
| I50     | $I50 = P75 - P25$                                                                                                    | Inter-quartile Range                                                                                                                           |
| MX      | $L_i \text{ maximum}$                                                                                                | Maximum value of the group of indices.                                                                                                         |
| MN      | $L_j \text{ minimum}$                                                                                                | Minimum value of the group of indices.                                                                                                         |

\*This table was taken from the Supplementary Information of the ProtDCal manuscript.<sup>1</sup>

**Table SM-12.** Aggregation operators: Information-Theory-based invariants.\*

| <b>Acronym</b> | <b>Formula (Equation)</b>                               | <b>Description</b>                                                                                                                                                                                |
|----------------|---------------------------------------------------------|---------------------------------------------------------------------------------------------------------------------------------------------------------------------------------------------------|
| MI             | $MI = -\sum_{i=1}^K \frac{N_k}{N} \log_2 \frac{N_k}{N}$ | Mean Information Content.<br>Where $N_k$ is the number of indices in the same bin, $K$ is the number of bins defined to compute the operator and $N$ is the total number of indices in the group. |
| TI             | $TI = N \log_2 N - \sum_{k=1}^K N_k \log_2 N_k$         | Total Information Content.                                                                                                                                                                        |
| SI             | $SI = \frac{TI}{N \log_2 N}$                            | Standardized Information Content                                                                                                                                                                  |

\*This table was taken from the Supplementary Information of the ProtDCal manuscript.<sup>1</sup>

## References

1. Ruiz-Blanco YB, Paz W, Green J, Marrero-Ponce Y (2015) ProtDCal: A program to compute general-purpose-numerical descriptors for sequences and 3D-structures of proteins. *BMC Bioinformatics* 16:162.
2. Lehninger. *Amino Acids, Peptides, and Proteins*. (2005) *Biochemistry*. pp. 76-115.
3. Collantes ER, Dunn-III WJ (1995) Amino acid side chain descriptors for quantitative structure-activity relationship studies of peptide analogues. *J Med Chem* 38:2705-2713.
4. Kyte J, Doolittle RF (1982) A Simple Method for Displaying the Hydrophobic Character of a Protein. *J Mol Biol* 157:105-132.
5. S K, M K, J J (1999) Modeling of the amino acid side chain effects on peptide conformation. *Bioorg Chem* 27:434-442.
6. Levitt M (1978) Conformational Preferences of Amino Acids in Globular Proteins. *Biochemistry* 17.
7. Hellberg S. S, M., Skagerberg B., Wold, S. (1987) Peptide Quantitative Structure-Activity Relationship, a Multivariate Approach. *J Med Chem* 30:1126-1135. .
8. Kamide K, Dobashi T. Chapter 6: Statistical Mechanics and Excluded Volume of Polymer Chains. (2000) *Physical Chemistry of Polymer Solutions Theoretical Background*. Elsevier Science.
9. Ruiz-Blanco YB, García Y, Sotomayor-Torres CM, Marrero-Ponce Y (2010) New Set of 2D/3D Thermodynamic Indices for Proteins. A Formalism Based on “Molten Globule” Theory. *Physics Procedia* 8:63-72.
10. Ruiz-Blanco YB, Marrero-Ponce Y, Paz W, García Y, Salgado J (2013) Global Stability of Protein Folding from an Empirical Free Energy Function. *Journal of Theoretical Biology* 321:44-53.
11. Jiang L, Kuhlman B, Kortemme T, Baker D (2005) A “solvated rotamer” approach to modeling water-mediated hydrogen bonds at protein-protein interfaces. *PROTEINS: Structure, Function, and Bioinformatics* 58:893-904.
12. Plaxco KW, Simons KT, Baker D (1998) Contact Order, Transition State Placement and the Refolding Rates of Single Domain Proteins. *J Mol Biol* 277:985-994.
13. Burrage JSaK (2006) Predicting residue-wise contact orders in proteins by support vector regression. *BMC Bioinformatics* 425.
14. Nolting B, Schalike W, Hampel P, Grundig F, Gantert S, Sips N, Bandlow W, Qi PX (2003) Structural determinants of the rate of protein folding. *J Theor Biol* 223:299-307.
15. Micheletti C (2003) Prediction of Folding Rates and Transition-State Placement From Native-State Geometry. *PROTEINS: Structure, Function, and Genetics* 51:74-84.
16. Zhou H, Zhou Y (2002) Folding Rate Prediction Using Total Contact Distance. *Biophysical Journal* 82:458-463.
